# Supplementary material for: Severe Neuro-COVID is associated with peripheral immune signatures, autoimmunity and signs of neurodegeneration: a prospective cross-sectional study
Source: bioRxiv or medRxiv preprint supplement (doi:10.1101/2022.02.18.22271039), 2022-03-02

**A Plasma: class I ◀ III, COVID ▶ controls**

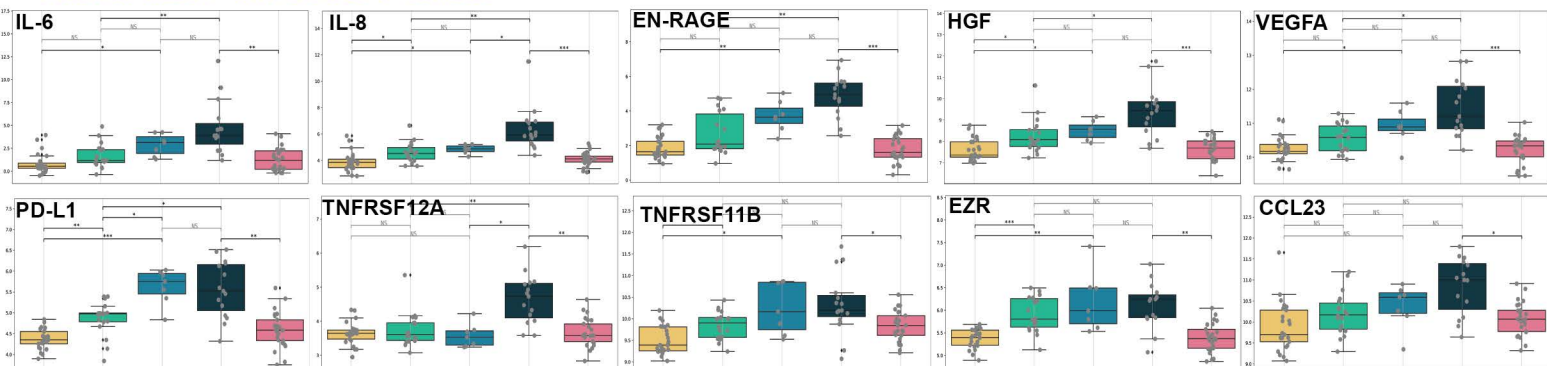

**B Plasma: class I ▶ III, COVID ◀ controls**

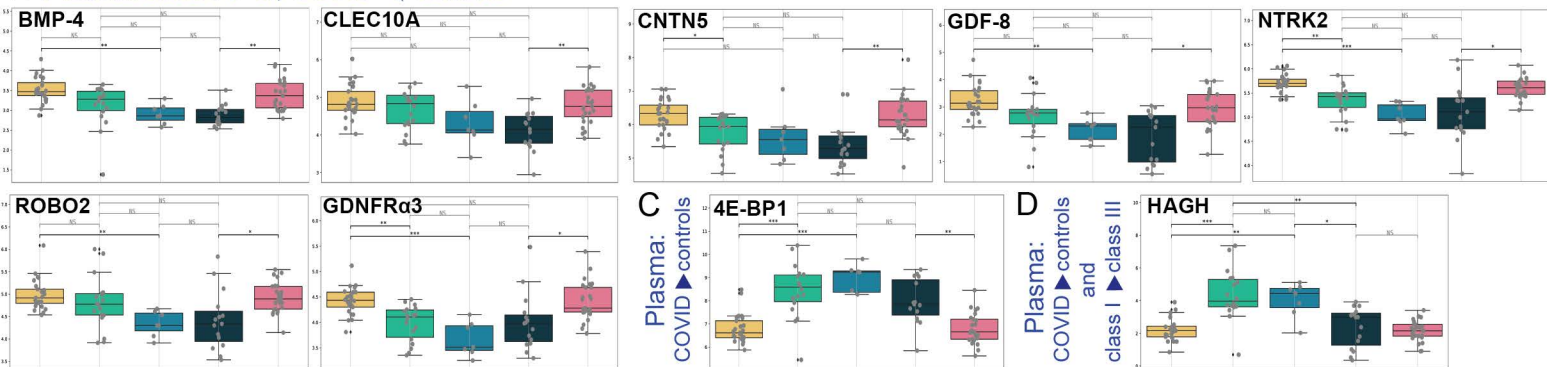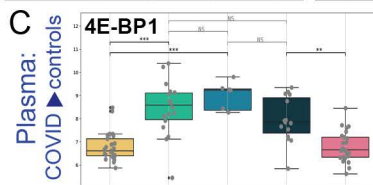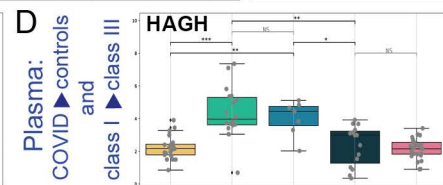

**E CSF: class I ◀ III**

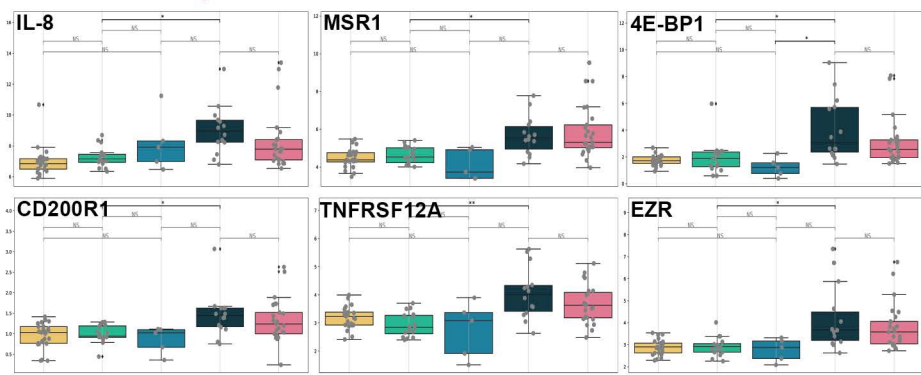

**F CSF: class I ◀ III and class III ▶ infl. controls**

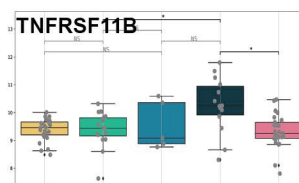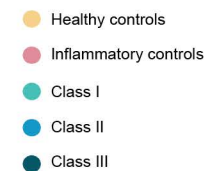

Supplement: Supplementary file [file media-18.pdf]
