# Supplementary material for: Severe Neuro-COVID is associated with peripheral immune signatures, autoimmunity and signs of neurodegeneration: a prospective cross-sectional study
Source: bioRxiv or medRxiv preprint supplement (doi:10.1101/2022.02.18.22271039), 2022-03-02

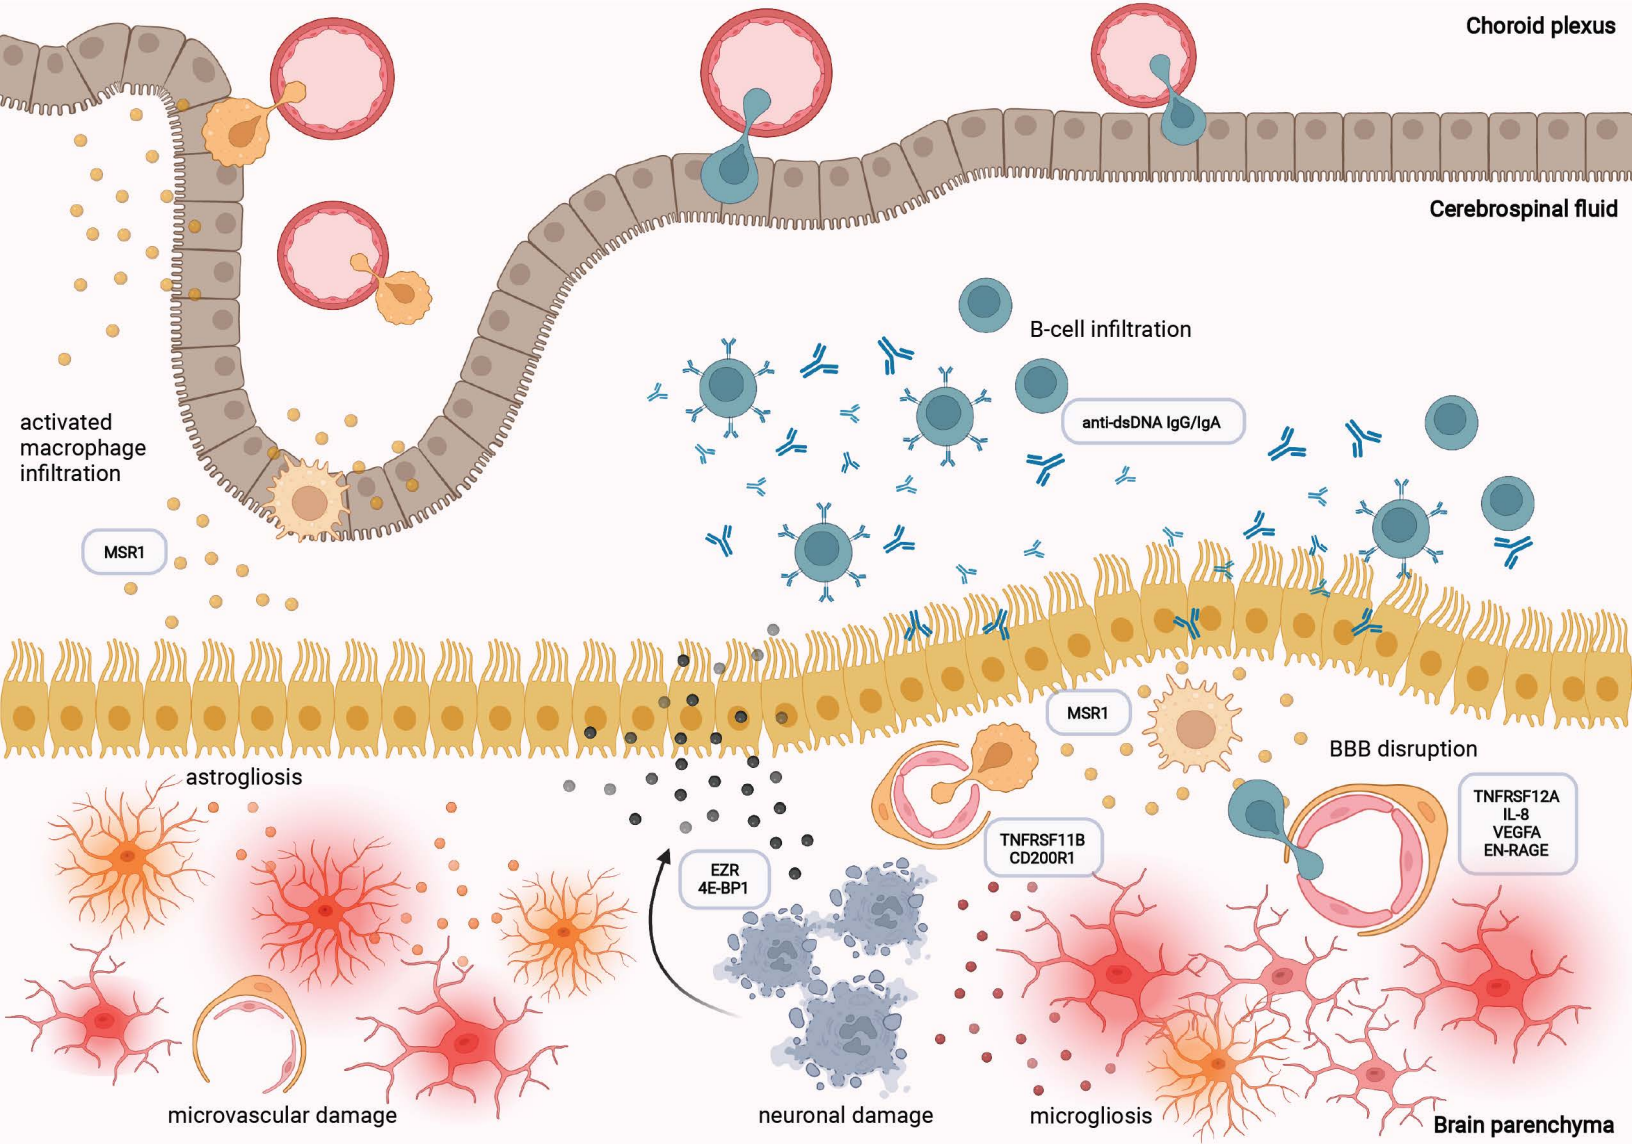

Supplement: Supplementary file [file media-22.pdf]
